# Supplementary material
Source: publisher figshare collection journal article supplement (https://gsapubs.figshare.com/ndownloader/files/34835994)
Supplement: Supplementary file 1 [file 34835994]

## Sheet: Sheet1
TABLE S2. AGE LIMITS ON LATEST ERUPTIONS OF CONEJOS FORMATION, PROXIMAL TO LA GARITA CALDERA
							REPOSE INTERVAL*			Age
	Sample	Rock type	Location	Mineral	Age, Ma		Maximum	Minimum	Notes:	source
EAST
	Wt mean	South Fork Tuff	South Fork area	Sanidine	29.08	±0.06		0.879	Upper age limit	1
	Wt mean	(Black Mountain T)			30.19	±0.16		1.989	Likely upper limit	1
	19L-1	Granodiorite	Sky City	Zircon	32.58	±0.49	4.379		On caldera wall	2
SOUTHEAST
	11L-7B	Black Mountain T	Caldera rim	Hornblende	30.19	±0.16		1.989	Upper age limit	1
	15L-32	Andesite cobble	Hwy 160, Wolf Creek	Plagioclase	30.59	±0.09	2.389		Upper volcaniclastic	3
SOUTHWEST
	06L-60	Ute Ridge Tuff	Caldera rim	Sanidine	28.98	±0.04		0.779	Upper age limit	1
WEST
	Wt mean	Masonic Park Tuff	Caldera rim	Biotite	28.92	±0.07		0.719	Upper age limit	4
	87L-35	Andesite lava	S slope Bristol Head	Hornblende	30.89	±023	2.689		On caldera wall	5
NORTHWEST
	Wt mean	Blue Mesa Tuff	Cebolla Creek	Sanidine	28.64	±0.04		0.439	Upper age limit	1
	Wt mean	Ute Ridge Tuff	Cebolla Creek	Sanidine	28.98	±0.04		0.779	Likely upper limit	1
	87L-51	Dacite lava	Cebolla Creek	Hornblende	30.5102	±0.38	2.30921		Top proximal flow	5
	NM-3047	Rhyolite lava	Cebolla Creek	Biotite	31.7047	±0.14	3.50373		Below Blue Creek T	1
NORTHEAST
	Wt mean	Saguache Creek T	Caldera rim	Sanidine	32.48	±0.06		4.279	Upper age limit	1
	01L-29	Dacite lava	Sawooth Mountain	Biotite	32.2182	±0.08	4.01721		Highest, below Saguache Creek T	1
	05L-45	Dacite lava	Carneros Pass	Sanidine	32.9431	±0.09	4.74212		Highest, below Fish Canyon Tuff	1
CALDERA INTERIOR
	Wt mean	Masonic Park T	La Garita caldera	Biotite	28.92	±0.07		0.719	But no direct info for intracaldera lava accumulations	4
				AVERAGE:			3.43275	1.4815
*Maximum: Youngest Conejos Formation (pre-Fish Canyon Tuff)
*Minimum: Oldest ignimbrite that caps Conejos Formation
Data source: 1. Lipman and McIntosh, 2008; 2. Analysis by A. Gilmer, this report, Table DR6; 3. Lipman and Zimmerer, 2019;
	4. Also bracketed by South Fork and Chiquito Peak Tuffs (Table DR1); 5. Lipman, 2006
All ages recalculated to Fish Canyon Tuff @ 28.201 Ma
Supplemental reference: Lipman, P.W., and Zimmerer, M.J., 2019, Magmato-tectonic links: Ignimbrite calderas, regional dike
swarms, and the transition from arc to rift in the Southern Rocky Mountains: Geosphere, v. 15, p.1893-1926

## Sheet: G49964
Lipman, P.W., Zimmerer, M.J., and Gilmer, A.K., 2022, Early incubation and prolonged maturation of large ignimbrite magma bodies: Evidence from the Southern Rocky Mountain volcanic field, Colorado, USA: Geology, v. 50, https://doi.org/10.1130/G49964.1
